# Supplementary material for: Relative Efficacy of Weight Management, Exercise, and Combined Treatment for Muscle Mass and Physical Sarcopenia Indices in Adults with Overweight or Obesity and Osteoarthritis: A Network Meta-Analysis of Randomized Controlled Trials
Source: MDPI journal article supplement (doi:10.3390/nu13061992), 2021-06-10
Supplement: s1 [file s1]

## Supplementary table S1

**Table S1. Database search formulas**

| Data base                                      | Search terms for query                                                                                                                      | (Final search date: May 12, 2021) |
|------------------------------------------------|---------------------------------------------------------------------------------------------------------------------------------------------|-----------------------------------|
| <b>Pubmed</b>                                  |                                                                                                                                             |                                   |
| #1                                             | (elder adults) OR order adults                                                                                                              |                                   |
| #2                                             | ((obesity) OR obese) OR overweight                                                                                                          |                                   |
| #3                                             | ((osteoarthritis) OR gonarthrosis) OR arthritis                                                                                             |                                   |
| #4                                             | (((((physical activity) OR exercise training) OR strengthening exercise) OR neuromuscular electrical stimulation) OR blood flow restriction |                                   |
| #5                                             | ((Diet intervention) OR weight loss) OR energy restriction                                                                                  |                                   |
| #6                                             | (Randomized controlled trial) OR Randomization                                                                                              |                                   |
| #7                                             | (((((#1) AND #2) AND #3) AND #4) AND #5) AND #6                                                                                             |                                   |
| <b>Physiotherapy Evidence Database (PEDro)</b> |                                                                                                                                             |                                   |
|                                                | Method: clinical trial                                                                                                                      |                                   |
|                                                | Abstract & Title:                                                                                                                           |                                   |
| #1                                             | elderly                                                                                                                                     |                                   |
| #2                                             | osteoarthritis                                                                                                                              |                                   |
| #3                                             | overweight OR obesity                                                                                                                       |                                   |
| #4                                             | diet                                                                                                                                        |                                   |
| #5                                             | physical activity                                                                                                                           |                                   |
| #6                                             | exercise training                                                                                                                           |                                   |
| #7                                             | neuromuscular electrical stimulation                                                                                                        |                                   |
| #8                                             | blood flow restriction                                                                                                                      |                                   |
| <b>Excerpta Medica dataBASE (EMBASE)</b>       |                                                                                                                                             |                                   |
| #1                                             | 'order adults '                                                                                                                             |                                   |
| #2                                             | 'osteoarthritis'                                                                                                                            |                                   |
| #3                                             | 'obesity' OR 'overweight'                                                                                                                   |                                   |
| #4                                             | 'diet'                                                                                                                                      |                                   |
| #5                                             | 'weight loss'                                                                                                                               |                                   |
| #6                                             | 'exercise training'                                                                                                                         |                                   |
| #7                                             | 'physical activity'                                                                                                                         |                                   |
| #8                                             | neuromuscular electrical stimulation                                                                                                        |                                   |
| #9                                             | blood flow restriction                                                                                                                      |                                   |
| #10                                            | #1 AND #2 AND #3                                                                                                                            |                                   |
| #11                                            | #4 OR #5 OR #6 OR #7 OR #8 OR #9                                                                                                            |                                   |
| #12                                            | #10 AND #11 AND ([randomized controlled trial]/lim) AND [humans]/lim                                                                        |                                   |

(continued)

**Table S1. continued**

| <b>Data base</b>                                    | <b>Search terms for query</b>           |
|-----------------------------------------------------|-----------------------------------------|
| <b>Cochrane Library Database</b>                    |                                         |
| #1                                                  | elderly                                 |
| #2                                                  | osteoarthritis                          |
| #3                                                  | overweight OR obesity                   |
| #4                                                  | diet                                    |
| #5                                                  | weight loss                             |
| #6                                                  | physical activity                       |
| #7                                                  | exercise training                       |
| #8                                                  | neuromuscular electrical stimulation    |
| #9                                                  | blood flow restriction                  |
| #10                                                 | #1 AND #2 AND #3                        |
| #11                                                 | #4 OR #5 OR #6 OR #7 OR #8 OR #9        |
| #12                                                 | Randomized controlled trial             |
| #13                                                 | #10 AND #11 AND #12                     |
| <b>ClinicalKey database</b>                         |                                         |
| #1                                                  | elderly OR older adults                 |
| #2                                                  | osteoarthritis                          |
| #3                                                  | overweight OR obesity                   |
| #4                                                  | diet OR weight loss                     |
| #5                                                  | exercise training                       |
| #6                                                  | randomized controlled trial             |
| <b>China knowledge resource integrated database</b> |                                         |
| #1                                                  | elderly                                 |
| #2                                                  | osteoarthritis                          |
| #3                                                  | overweight OR obesity                   |
| #4                                                  | diet                                    |
| #5                                                  | weight loss                             |
| #6                                                  | exercise training                       |
| #7                                                  | #4 OR #5 OR #6                          |
| #8                                                  | randomized controlled trial             |
| #9                                                  | #1 AND #2 AND #3 AND #7 AND #8          |
| <b>Google Scholar</b>                               |                                         |
| #1                                                  | allintitle: elderly OR older adults     |
| #2                                                  | allintitle: osteoarthritis              |
| #3                                                  | allintitle: overweight OR obesity       |
| #4                                                  | allintitle: diet OR weight loss         |
| #5                                                  | allintitle: exercise training           |
| #6                                                  | allintitle: randomized controlled trial |

**Table S2. Summary of methodological quality based on the PEDro classification scale<sup>a</sup>**

| Study author (year)    | Overall <sup>b</sup> | Eligibility criteria <sup>c</sup> | 1         | 2         | 3         | 4        | 5        | 6              | 7              | 8         | 9              | 10             |
|------------------------|----------------------|-----------------------------------|-----------|-----------|-----------|----------|----------|----------------|----------------|-----------|----------------|----------------|
| Beavers, 2015          | 5/10 <sup>d</sup>    | X                                 | X         |           | X         |          |          | X <sup>d</sup> |                |           | X              | X              |
| Christensen 2005       | 5/10                 | X                                 | X         |           | X         |          |          |                | X              |           | X              | X              |
| Christensen 2013       | 8/10                 | X                                 | X         | X         | X         |          |          | X              | X              | X         | X              | X              |
| Christensen 2015       | 7/10 <sup>d</sup>    |                                   | X         | X         | X         |          |          | X <sup>d</sup> |                | X         | X              | X              |
| Christensen 2017       | 7/10                 | X                                 | X         | X         | X         |          |          | X              |                | X         | X              | X              |
| Ghroubi, 2008          | 4/10 <sup>d</sup>    | X                                 | X         |           | X         |          |          |                |                | X         | X <sup>d</sup> | X              |
| Gill, 2009             | 7/10                 | X                                 | X         | X         | X         |          |          | X              | X              |           | X              | X              |
| Kuptniratsaikul, 2019  | 8/10                 | X                                 | X         | X         | X         |          |          | X              | X              | X         | X              | X              |
| Lim 2010               | 7/10                 | X                                 | X         |           | X         |          |          | X              | X              | X         | X              | X              |
| López-Gómez, 2020      | 6/10                 | X                                 | X         |           | X         |          |          |                | X              | X         | X              | X              |
| Magrans-Courtney, 2011 | 7/10                 | X                                 | X         |           | X         |          |          | X              | X              | X         | X              | X              |
| Mahmoud 2017           | 7/10                 | X                                 | X         |           | X         |          |          | X              | X              | X         | X              | X              |
| Mangani, 2006          | 5/10 <sup>d</sup>    | X                                 | X         |           | X         |          |          | X <sup>d</sup> |                |           | X              | X <sup>d</sup> |
| Matsuse, 2020          | 6/10                 |                                   | X         | X         | X         |          |          | X              |                |           | X              | X              |
| McLeod, 2020           | 5/10                 | X                                 | X         |           | X         |          |          |                | X              |           | X              | X              |
| Messier, 2000          | 6/10                 | X                                 | X         |           | X         |          |          | X              | X              |           | X              | X              |
| Messier, 2013          | 7/10                 | X                                 | X         |           | X         |          |          | X              | X              | X         | X              | X              |
| Miller, 2006           | 5/10                 | X                                 | X         |           | X         |          |          |                | X              |           | X              | X              |
| Miller, 2012           | 5/10                 | X                                 | X         |           | X         |          |          |                | X              |           | X              | X              |
| Rabe, 2018             | 5/10                 | X                                 | X         |           | X         |          |          | X              |                |           | X              | X              |
| Robbins, 2020          | 8/10                 |                                   | X         | X         | X         |          |          | X              | X              | X         | X              | X              |
| Rosemffet, 2004        | 4/10                 |                                   | X         |           | X         |          |          |                |                |           | X              | X              |
| Segal, 2012a           | 7/10                 | X                                 | X         | X         | X         |          |          | X              | X              |           | X              | X              |
| Segal, 2012b           | 7/10                 | X                                 | X         | X         | X         |          |          | X              | X              |           | X              | X              |
| Skou, 2015             | 8/10                 | X                                 | X         | X         | X         |          |          | X              | X              | X         | X              | X              |
| Skou, 2018             | 8/10                 | X                                 | X         | X         | X         |          |          | X              | X              | X         | X              | X              |
| Swank, 2011            | 5/10                 | X                                 | X         |           | X         |          |          |                | X              |           | X              | X              |
| Tak, 2005              | 7/10                 | X                                 | X         |           | X         |          |          | X              | X              | X         | X              | X              |
| Talbot, 2003a          | 5/10                 | X                                 | X         |           | X         |          |          |                | X              |           | X              | X              |
| Talbot, 2003b          | 5/10                 | X                                 | X         |           | X         |          |          |                | X              |           | X              | X              |
| Toda, 2000             | 6/10                 | X                                 | X         |           | X         |          |          |                | X              | X         | X              | X              |
| Toda, 2001             | 7/10                 | X                                 | X         |           | X         |          |          | X              | X              | X         | X              | X              |
| Wallis, 2017           | 8/10                 | X                                 | X         | X         | X         |          |          | X              | X              | X         | X              | X              |
| Wang, 2007             | 5/10 <sup>d</sup>    | X                                 | X         |           | X         |          |          |                | X <sup>d</sup> |           | X              | X              |
| Summary <sup>e</sup>   |                      | <b>30</b>                         | <b>34</b> | <b>12</b> | <b>34</b> | <b>0</b> | <b>0</b> | <b>22</b>      | <b>26</b>      | <b>16</b> | <b>34</b>      | <b>34</b>      |

<sup>a</sup>PEDro, Physiotherapy Evidence Database. Guideline of PEDro scale is available from PEDro database (<https://www.pedro.org.au/english/downloads/pedro-scale/>).

<sup>b</sup>Points of methodological quality are denoted as “X” for fulfilled criteria.

<sup>c</sup>This item is not used to calculate the total score.

<sup>d</sup>Score was determined by a third assessor.

<sup>e</sup>This was calculated as the number of studies satisfied.

PEDro classification scale: 1 = random allocation, 2 = concealed allocation, 3 = similarity at the baseline, 4 = subject blinding, 5 = therapist blinding, 6 = assessor blinding, 7 = more than 85% follow-up for at least one key outcome, 8 = intention-to-treat analysis, 9 = between-group statistical comparison for at least one key outcome, 10 = point and variability measures for at least one key outcome. Methodological quality: high,  $\geq 7$  points; medium, 4–6 points; low,  $\leq 3$  points.

Table S3. League table for pairwise and network meta-analysis of mean change in muscle mass from baseline

| Relative effects<br>of network meta-<br>analyses | Direct evidence of pairwise meta-analyses |                     |                    |                    |                    |                     |                    |                    |                     |                    |                     |                     |                     |                     |                    |                    |                     |                     |
|--------------------------------------------------|-------------------------------------------|---------------------|--------------------|--------------------|--------------------|---------------------|--------------------|--------------------|---------------------|--------------------|---------------------|---------------------|---------------------|---------------------|--------------------|--------------------|---------------------|---------------------|
|                                                  | V1                                        | V2                  | V3                 | V4                 | V5                 | V6                  | V7                 | V8                 | V9                  | V10                | V11                 | V12                 | V13                 | V14                 | V15                | V16                | V17                 | V18                 |
| 1                                                | RMMR + RET                                |                     |                    |                    | 0.48 (-0.07, 1.03) |                     |                    |                    | 0.64 (0.01, 1.29)   |                    |                     | 0.61 (-0.06, 1.28)  | 0.76 (0.19, 1.33)   |                     |                    |                    |                     | 1.26 (0.59, 1.92)   |
| 2                                                | 0.41 (-0.24, 1.06)                        | RMMR_DIA + MET      |                    |                    |                    | 0.15 (-0.23, 0.54)  |                    |                    |                     |                    |                     |                     |                     | 0.36 (-0.03, 0.75)  |                    |                    |                     | 1.16 (0.75, 1.58)   |
| 3                                                | 0.36 (-0.53, 1.26)                        | -0.05 (-0.92, 0.83) | AQET               |                    |                    |                     | 0.38 (-0.39, 1.15) |                    | 0.27 (-0.48, 1.03)  |                    |                     |                     |                     |                     |                    |                    |                     | .                   |
| 4                                                | 0.39 (-0.59, 1.38)                        | -0.02 (-1.01, 0.98) | 0.03 (-1.03, 1.10) | RET + BFR          |                    |                     |                    |                    | 0.37 (-0.42, 1.16)  |                    |                     |                     |                     |                     |                    |                    |                     | .                   |
| 5                                                | 0.47 (-0.08, 1.02)                        | 0.06 (-0.60, 0.71)  | 0.11 (-0.80, 1.01) | 0.07 (-0.92, 1.07) | RMMR + AET         |                     |                    |                    | 0.55 (-0.13, 1.23)  |                    |                     | 0.52 (-0.18, 1.23)  | 0.34 (-0.22, 0.91)  |                     |                    |                    |                     | 1.17 (0.47, 1.86)   |
| 6                                                | 0.60 (-0.07, 1.28)                        | 0.19 (-0.15, 0.54)  | 0.24 (-0.65, 1.14) | 0.21 (-0.80, 1.22) | 0.14 (-0.54, 0.82) | RMMR_DIA            |                    |                    |                     |                    |                     |                     |                     | 0.21 (-0.18, 0.60)  |                    |                    |                     | 1.02 (0.35, 1.69)   |
| 7                                                | 0.60 (-0.17, 1.38)                        | 0.19 (-0.52, 0.90)  | 0.24 (-0.49, 0.97) | 0.21 (-0.79, 1.21) | 0.14 (-0.65, 0.92) | -0.00 (-0.74, 0.74) | IMET               |                    | -0.11 (-0.88, 0.66) |                    |                     |                     |                     |                     |                    |                    |                     | 1.13 (0.27, 1.98)   |
| 8                                                | 0.71 (-0.15, 1.57)                        | 0.30 (-0.37, 0.96)  | 0.34 (-0.70, 1.39) | 0.31 (-0.83, 1.46) | 0.24 (-0.63, 1.11) | 0.10 (-0.57, 0.78)  | 0.10 (-0.81, 1.02) | DIA + MET          |                     |                    |                     |                     |                     | 0.26 (-0.32, 0.84)  |                    |                    |                     |                     |
| 9                                                | 0.77 (0.17, 1.36)                         | 0.35 (-0.25, 0.96)  | 0.40 (-0.32, 1.12) | 0.37 (-0.42, 1.16) | 0.30 (-0.31, 0.90) | 0.16 (-0.47, 0.80)  | 0.16 (-0.46, 0.78) | 0.06 (-0.78, 0.89) | RET                 |                    | 0.06 (-0.80, 0.93)  | -0.03 (-0.68, 0.61) | -0.25 (-0.91, 0.42) |                     |                    |                    |                     | 0.61 (-0.01, 1.24)  |
| 10                                               | 0.81 (-0.01, 1.62)                        | 0.40 (-0.44, 1.23)  | 0.44 (-0.62, 1.51) | 0.41 (-0.73, 1.56) | 0.34 (-0.47, 1.15) | 0.20 (-0.65, 1.06)  | 0.20 (-0.75, 1.16) | 0.10 (-0.91, 1.11) | 0.04 (-0.79, 0.87)  | RUMR               |                     |                     | 0.08 (-0.52, 0.69)  |                     |                    |                    |                     |                     |
| 11                                               | 0.83 (-0.22, 1.88)                        | 0.42 (-0.64, 1.47)  | 0.47 (-0.65, 1.59) | 0.44 (-0.73, 1.60) | 0.36 (-0.69, 1.42) | 0.23 (-0.85, 1.30)  | 0.23 (-0.83, 1.29) | 0.12 (-1.08, 1.32) | 0.06 (-0.80, 0.93)  | 0.02 (-1.17, 1.22) | DIA + RET           |                     |                     |                     |                    |                    |                     |                     |
| 12                                               | 0.82 (0.19, 1.46)                         | 0.41 (-0.27, 1.09)  | 0.46 (-0.46, 1.38) | 0.43 (-0.58, 1.44) | 0.36 (-0.29, 1.00) | 0.22 (-0.48, 0.92)  | 0.22 (-0.58, 1.02) | 0.12 (-0.77, 1.00) | 0.06 (-0.57, 0.69)  | 0.02 (-0.85, 0.88) | -0.01 (-1.07, 1.06) | AET                 | -0.22 (-0.90, 0.47) |                     |                    |                    |                     | 0.64 (-0.01, 1.29)  |
| 13                                               | 0.89 (0.35, 1.43)                         | 0.48 (-0.09, 1.05)  | 0.53 (-0.35, 1.40) | 0.50 (-0.48, 1.47) | 0.42 (-0.12, 0.97) | 0.29 (-0.32, 0.89)  | 0.29 (-0.45, 1.02) | 0.18 (-0.62, 0.99) | 0.12 (-0.44, 0.69)  | 0.08 (-0.52, 0.69) | 0.06 (-0.97, 1.09)  | 0.07 (-0.55, 0.68)  | RMMR                | -0.32 (-1.29, 0.65) |                    | 0.05 (-0.88, 0.99) |                     | 0.52 (-0.03, 1.07)  |
| 14                                               | 0.97 (0.34, 1.60)                         | 0.56 (0.24, 0.88)   | 0.61 (-0.26, 1.47) | 0.57 (-0.41, 1.56) | 0.50 (-0.14, 1.14) | 0.36 (0.02, 0.71)   | 0.37 (-0.34, 1.07) | 0.26 (-0.32, 0.84) | 0.20 (-0.39, 0.80)  | 0.16 (-0.66, 0.98) | 0.14 (-0.91, 1.19)  | 0.15 (-0.52, 0.81)  | 0.08 (-0.47, 0.63)  | MET                 |                    | 0.38 (-0.60, 1.35) | 0.29 (-0.13, 0.70)  | 0.15 (-0.24, 0.53)  |
| 15                                               | 1.26 (0.37, 2.16)                         | 0.85 (0.12, 1.59)   | 0.90 (-0.17, 1.97) | 0.87 (-0.30, 2.04) | 0.80 (-0.11, 1.70) | 0.66 (-0.09, 1.41)  | 0.66 (-0.28, 1.60) | 0.56 (-0.35, 1.46) | 0.50 (-0.37, 1.37)  | 0.46 (-0.58, 1.50) | 0.43 (-0.79, 1.66)  | 0.44 (-0.48, 1.36)  | 0.37 (-0.47, 1.22)  | 0.30 (-0.40, 0.99)  | IMMR_DIA           |                    | 0.13 (-0.44, 0.71)  |                     |
| 16                                               | 1.29 (0.36, 2.21)                         | 0.88 (0.04, 1.71)   | 0.92 (-0.19, 2.04) | 0.89 (-0.32, 2.10) | 0.82 (-0.11, 1.75) | 0.68 (-0.17, 1.54)  | 0.68 (-0.32, 1.69) | 0.58 (-0.42, 1.58) | 0.52 (-0.39, 1.44)  | 0.48 (-0.55, 1.51) | 0.46 (-0.80, 1.71)  | 0.46 (-0.49, 1.42)  | 0.40 (-0.44, 1.23)  | 0.32 (-0.50, 1.13)  | 0.02 (-1.02, 1.07) | RMMR + MET         |                     | -0.21 (-1.16, 0.74) |
| 17                                               | 1.40 (0.71, 2.09)                         | 0.99 (0.53, 1.44)   | 1.04 (0.13, 1.94)  | 1.00 (-0.02, 2.03) | 0.93 (0.23, 1.63)  | 0.79 (0.31, 1.28)   | 0.80 (0.05, 1.55)  | 0.69 (-0.01, 1.39) | 0.63 (-0.02, 1.29)  | 0.59 (-0.27, 1.46) | 0.57 (-0.51, 1.65)  | 0.58 (-0.14, 1.29)  | 0.51 (-0.11, 1.13)  | 0.43 (0.04, 0.82)   | 0.13 (-0.44, 0.71) | 0.11 (-0.76, 0.98) | RUMR_DIA            | -0.15 (-0.56, 0.27) |
| 18                                               | 1.40 (0.83, 1.97)                         | 0.99 (0.67, 1.30)   | 1.04 (0.21, 1.86)  | 1.00 (0.06, 1.95)  | 0.93 (0.35, 1.51)  | 0.79 (0.43, 1.16)   | 0.79 (0.15, 1.44)  | 0.69 (0.03, 1.35)  | 0.63 (0.11, 1.16)   | 0.59 (-0.19, 1.37) | 0.57 (-0.44, 1.58)  | 0.58 (-0.03, 1.18)  | 0.51 (0.01, 1.00)   | 0.43 (0.13, 0.73)   | 0.13 (-0.56, 0.83) | 0.11 (-0.69, 0.91) | -0.00 (-0.39, 0.39) | UC                  |

Pairwise (upper right portion) and network (lower left portion) meta-analysis results are presented for mean change (from baseline) in muscle mass outcomes. Interventions are reported in order of efficacy ranked according to P scores. Effect estimation is presented in standardized mean difference (SMD) with 95% CI. Significant results are marked in red.

AET, aerobic exercise training; AQET, aquatic exercise training; BFR, blood flow restriction; DIA, diet instruction and advisement; IMET, isometric exercise training; IMMR, intermittent multi-meal replacement; MET, multicomponent exercise training; RUMR, regular uni-meal replacement; RMMR, regular multi-meal replacement; RET, resistance exercise training; UC, usual care.

Table S4. League table for pairwise and network meta-analysis of mean change in muscle strength from baseline

| Relative effects of network meta-analyses | Direct evidence of pairwise meta-analyses |                     |                    |                    |                    |                    |                    |                     |                    |                   |
|-------------------------------------------|-------------------------------------------|---------------------|--------------------|--------------------|--------------------|--------------------|--------------------|---------------------|--------------------|-------------------|
|                                           | V1                                        | V2                  | V3                 | V4                 | V5                 | V6                 | V7                 | V8                  | V9                 | V10               |
| 1                                         | RMMR_DIA + MET                            |                     |                    | 0.55 (0.22, 0.87)  |                    |                    |                    |                     |                    | 1.64 (1.29, 1.99) |
| 2                                         | 0.44 (0.01, 0.88)                         | DIA + MET           |                    | 0.17 (-0.24, 0.59) |                    |                    | 0.52 (0.26, 0.77)  | 0.68 (0.26, 1.11)   |                    |                   |
| 3                                         | 0.42 (-0.15, 0.98)                        | -0.02 (-0.50, 0.45) | AET                |                    |                    |                    | 0.51 (0.10, 0.91)  |                     | 0.59 (0.17, 1.01)  |                   |
| 4                                         | 0.55 (0.22, 0.87)                         | 0.10 (-0.19, 0.40)  | 0.13 (-0.34, 0.59) | MET                | 0.02 (-0.27, 0.30) |                    | 0.42 (0.20, 0.65)  | 0.51 (0.10, 0.93)   |                    | 1.09 (0.76, 1.43) |
| 5                                         | 0.62 (0.20, 1.04)                         | 0.18 (-0.17, 0.53)  | 0.20 (-0.29, 0.69) | 0.07 (-0.20, 0.35) | RUMR_DIA           |                    | 0.25 (-0.04, 0.53) |                     |                    |                   |
| 6                                         | 0.70 (0.14, 1.25)                         | 0.25 (-0.21, 0.71)  | 0.28 (-0.29, 0.84) | 0.15 (-0.30, 0.60) | 0.07 (-0.40, 0.55) | RMMR + MET         | 0.23 (-0.16, 0.62) |                     |                    |                   |
| 7                                         | 0.93 (0.53, 1.32)                         | 0.48 (0.24, 0.73)   | 0.51 (0.10, 0.91)  | 0.38 (0.16, 0.60)  | 0.30 (0.03, 0.58)  | 0.23 (-0.16, 0.62) | UC                 | -0.19 (-0.59, 0.22) | 0.08 (-0.31, 0.48) |                   |
| 8                                         | 0.96 (0.47, 1.45)                         | 0.51 (0.14, 0.89)   | 0.54 (0.00, 1.08)  | 0.41 (0.04, 0.78)  | 0.34 (-0.09, 0.76) | 0.26 (-0.26, 0.79) | 0.03 (-0.32, 0.39) | DIA                 |                    |                   |
| 9                                         | 1.01 (0.45, 1.56)                         | 0.57 (0.10, 1.03)   | 0.59 (0.17, 1.01)  | 0.46 (0.01, 0.91)  | 0.39 (-0.09, 0.87) | 0.31 (-0.24, 0.87) | 0.08 (-0.31, 0.48) | 0.05 (-0.48, 0.58)  | RET                |                   |
| 10                                        | 1.64 (1.29, 1.99)                         | 1.20 (0.75, 1.65)   | 1.22 (0.65, 1.80)  | 1.09 (0.76, 1.43)  | 1.02 (0.59, 1.45)  | 0.95 (0.39, 1.50)  | 0.72 (0.32, 1.12)  | 0.68 (0.19, 1.18)   | 0.63 (0.07, 1.20)  | RMMR_DIA          |

Pairwise (upper right portion) and network (lower left portion) meta-analysis results are presented for mean change (from baseline) in muscle mass outcomes. Interventions are reported in order of efficacy ranked according to P scores. Effect estimation is presented in standardized mean difference (SMD) with 95% CI. Significant results are marked in red.

AET, aerobic exercise training; DIA, diet instruction and advisement; MET, multicomponent exercise training; RUMR, regular uni-meal replacement; RMMR, regular multi-meal replacement; RET, resistance exercise training; UC, usual care.

Table S5. League table for pairwise and network meta-analysis of mean change in walk speed from baseline

| Relative effects of network meta-analyses | Direct evidence of pairwise meta-analyses |                     |                    |                    |                    |                    |                    |                    |                    |
|-------------------------------------------|-------------------------------------------|---------------------|--------------------|--------------------|--------------------|--------------------|--------------------|--------------------|--------------------|
|                                           | V1                                        | V2                  | V3                 | V4                 | V5                 | V6                 | V7                 | V8                 | V9                 |
| 1                                         | AET                                       |                     | 0.00 (-0.91, 0.91) |                    |                    |                    | 0.41 (-0.04, 0.85) |                    | 0.47 (0.15, 0.80)  |
| 2                                         | 0.01 (-0.44, 0.46)                        | DIA + MET           |                    |                    |                    |                    |                    | 1.12 (0.21, 2.03)  | 0.36 (0.02, 0.69)  |
| 3                                         | 0.00 (-0.91, 0.91)                        | -0.01 (-1.03, 1.01) | NMES + AET         |                    |                    |                    |                    |                    |                    |
| 4                                         | 0.18 (-0.48, 0.84)                        | 0.17 (-0.55, 0.88)  | 0.18 (-0.95, 1.30) | AQET               |                    |                    | 0.22 (-0.30, 0.74) |                    |                    |
| 5                                         | 0.18 (-0.42, 0.78)                        | 0.17 (-0.46, 0.80)  | 0.18 (-0.91, 1.27) | 0.00 (-0.75, 0.76) | NMES               |                    | 0.38 (-0.34, 1.10) |                    | 0.11 (-0.61, 0.83) |
| 6                                         | 0.23 (-0.30, 0.75)                        | 0.22 (-0.30, 0.74)  | 0.23 (-0.82, 1.28) | 0.05 (-0.71, 0.82) | 0.05 (-0.63, 0.73) | RMMR + MET         |                    |                    | 0.23 (-0.19, 0.65) |
| 7                                         | 0.40 (0.00, 0.80)                         | 0.39 (-0.10, 0.88)  | 0.40 (-0.60, 1.39) | 0.22 (-0.30, 0.74) | 0.22 (-0.32, 0.76) | 0.17 (-0.39, 0.73) | RET                |                    | 0.15 (-0.27, 0.57) |
| 8                                         | 0.44 (-0.11, 0.99)                        | 0.43 (-0.07, 0.94)  | 0.44 (-0.62, 1.51) | 0.27 (-0.52, 1.05) | 0.26 (-0.44, 0.97) | 0.22 (-0.40, 0.83) | 0.05 (-0.54, 0.63) | MET                | 0.22 (-0.28, 0.73) |
| 9                                         | 0.46 (0.14, 0.78)                         | 0.45 (0.13, 0.77)   | 0.46 (-0.51, 1.43) | 0.28 (-0.36, 0.92) | 0.28 (-0.26, 0.82) | 0.23 (-0.19, 0.65) | 0.06 (-0.31, 0.43) | 0.01 (-0.43, 0.46) | UC                 |

Pairwise (upper right portion) and network (lower left portion) meta-analysis results are presented for mean change (from baseline) in walking speed outcomes. Interventions are reported in order of efficacy ranked according to P scores. Effect estimation is presented in standardized mean difference (SMD) with 95% CI. Significant results are marked in red.

AET, aerobic exercise training; AQET, aquatic exercise training; DIA, diet instruction and advisement; NMES, neuromuscular electric stimulation; MET, multicomponent exercise training; RMMR, regular multi-meal replacement; RET, resistance exercise training; UC, usual care.

**Table S6. Results of network meta-regression analyses for associations of moderators with treatment efficiency**

| Moderator                     | Muscle mass    |         |        |                          | Muscle strength |        |        |                          | Walk speed     |        |        |                          |
|-------------------------------|----------------|---------|--------|--------------------------|-----------------|--------|--------|--------------------------|----------------|--------|--------|--------------------------|
|                               | B <sup>a</sup> | SE      | Median | 95% Credibility Interval | B <sup>a</sup>  | SE     | Median | 95% Credibility Interval | B <sup>a</sup> | SE     | Median | 95% Credibility Interval |
| Age                           | −0.276         | 0.0016  | 0.275  | −0.372, 0.923            | −0.211          | 0.0049 | −0.240 | −2.165, 1.852            | −0.643         | 0.0040 | −0.529 | −2.478, 0.681            |
| BMI                           | −0.381         | 0.0015  | −0.386 | −0.979, 0.245            | 0.650           | 0.0064 | −2.002 | 0.663, 3.178             | 0.641          | 0.0030 | 0.591  | −0.414, 1.934            |
| Sex distribution <sup>b</sup> | −0.159         | 0.0016  | −0.162 | −0.768, 0.479            | −0.232          | 0.0129 | −0.181 | −5.691, 5.025            | 0.263          | 0.0018 | 0.254  | −0.413, 0.986            |
| Treatment duration            | −0.324         | 0.0018  | −0.332 | −1.001, 0.390            | −1.357          | 0.0064 | −1.428 | −0.332, 1.411            | 0.142          | 0.0022 | 0.142  | −0.308, 0.594            |
| Sample size                   | −0.491         | 0.00267 | −0.507 | −1.497, 0.591            | −0.339          | 0.0044 | −0.339 | −2.167, 1.454            | 1.633          | 0.0028 | 0.158  | −0.443, 0.810            |
| PEDro score                   | −0.172         | 0.0014  | −0.182 | −0.694, 0.391            | −0.558          | 0.0054 | −0.575 | −2.748, 1.629            | 0.210          | 0.0033 | 0.203  | −0.401, 0.862            |

<sup>a</sup>Data represents the change in effects associated with the moderator indicated. SE, standard error.

<sup>b</sup>The proportion of female participants in sample

**Table S7. Summary of adverse events of the included studies.**

| Study author (year)       | Diet                 |                          | Exercise             |                          |
|---------------------------|----------------------|--------------------------|----------------------|--------------------------|
|                           | Related to treatment | Not related to treatment | Related to treatment | Not related to treatment |
| <b>Diet alone</b>         |                      |                          |                      |                          |
| Christensen 2005          | 3 (48)               | 0                        |                      |                          |
| Christensen 2017          | 29 (153)             | 35 (153)                 |                      |                          |
| López-Gómez, 2020         | NR                   | NR                       |                      |                          |
| <b>Exercise alone</b>     |                      |                          |                      |                          |
| Gill, 2009                |                      |                          | 0                    | 12 (82)                  |
| Kuptniratsaikul, 2019     |                      |                          | 18 (71)              | 6 (71)                   |
| Lim 2010                  |                      |                          | 3 (75)               | 1 (75)                   |
| Mahmoud 2017              |                      |                          | NR                   | NR                       |
| Mangani, 2006             |                      |                          | NR                   | NR                       |
| Matsuse, 2020             |                      |                          | 3 (28)               | 1 (28)                   |
| Rabe, 2018                |                      |                          | 0                    | 4 (42)                   |
| Rosemffet, 2004           |                      |                          | NR                   | NR                       |
| Segal, 2012a              |                      |                          | NR                   | NR                       |
| Segal, 2012b              |                      |                          | NR                   | NR                       |
| Swank, 2011               |                      |                          | NR                   | NR                       |
| Tak, 2005                 |                      |                          | NR                   | NR                       |
| Talbot, 2003a             |                      |                          | NR                   | NR                       |
| Talbot, 2003b             |                      |                          | NR                   | NR                       |
| Wallis, 2017              |                      |                          | 2 (23)               | 0                        |
| <b>Combined treatment</b> |                      |                          |                      |                          |
| Beavers, 2015             | NR                   | NR                       | NR                   | NR                       |
| Christensen 2013          | 0                    | 0                        | 1 (58)               | 0                        |
| Christensen 2015          | 0                    | 0                        | 1 (58)               | 0                        |
| Ghroubi, 2008             | NR                   | NR                       | NR                   | NR                       |
| Magrans-Courtney, 2011    | NR                   | NR                       | NR                   | NR                       |
| McLeod, 2020              | NR                   | NR                       | NR                   | NR                       |
| Messier, 2000             | NR                   | NR                       | NR                   | NR                       |
| Messier, 2013             | 0                    | 1 (152)                  | 3 (152)              | 3 (150)                  |
| Miller, 2006              | 0                    | 0                        | 0                    | 0                        |
| Miller, 2012              | 0                    | 0                        | 0                    | 0                        |
| Robbins, 2020             | 6 (37)               | 0                        | 7 (57)               | 0                        |
| Skou, 2015                | 0                    | 0                        | 26 (50)              | 12 (50)                  |
| Skou, 2018                | NR                   | NR                       | NR                   | NR                       |
| Toda, 2000                | NR                   | NR                       | NR                   | NR                       |
| Toda, 2001                | NR                   | NR                       | NR                   | NR                       |
| Wang, 2007                | 0                    | 0                        | 0                    | 0                        |

All data are presented as number of patients (total sample size of the treatment group).

NR, not reported.



Supplementary figure S1

(A) Overall follow-up duration

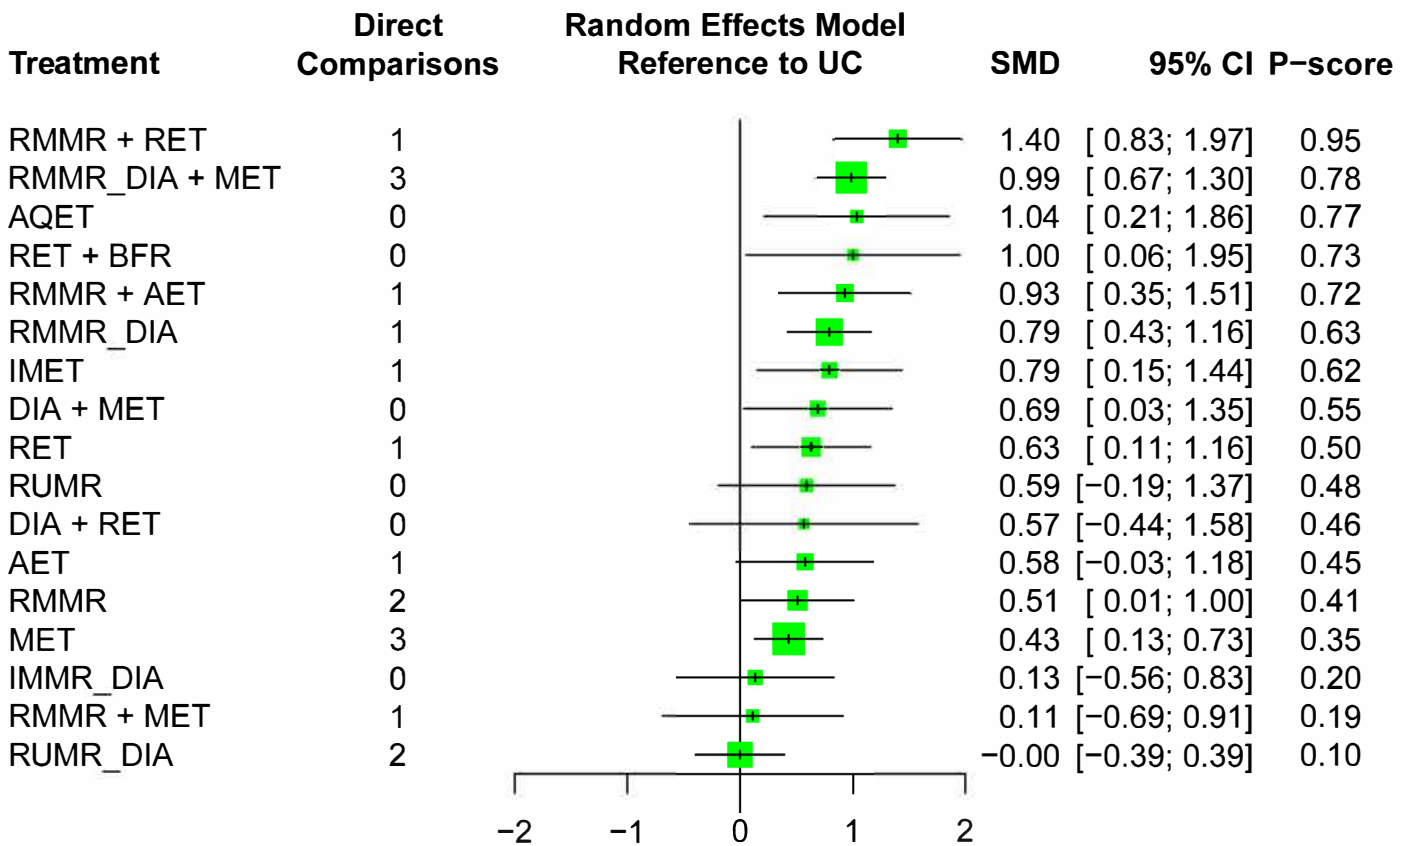

(B) Follow up >6 months

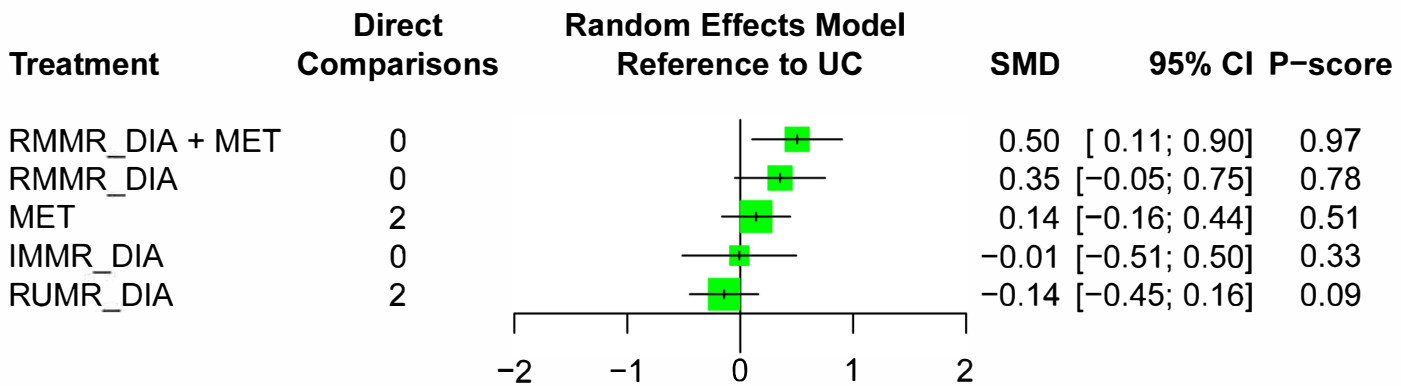

(C) Follow up >3 months, ≤6 months

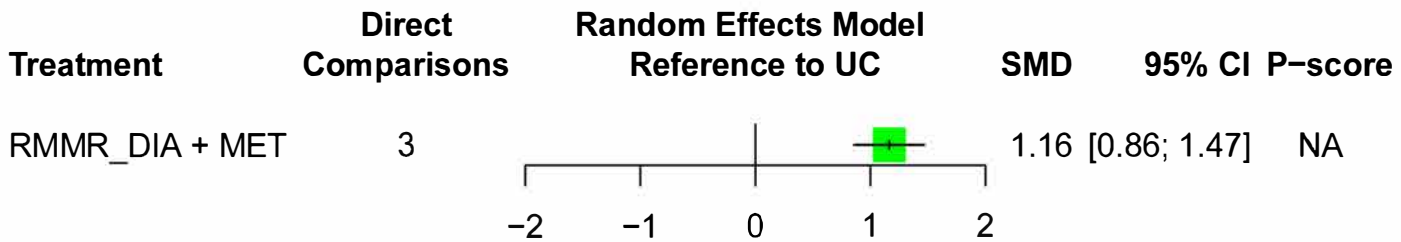

(D) Follow up ≤3 months

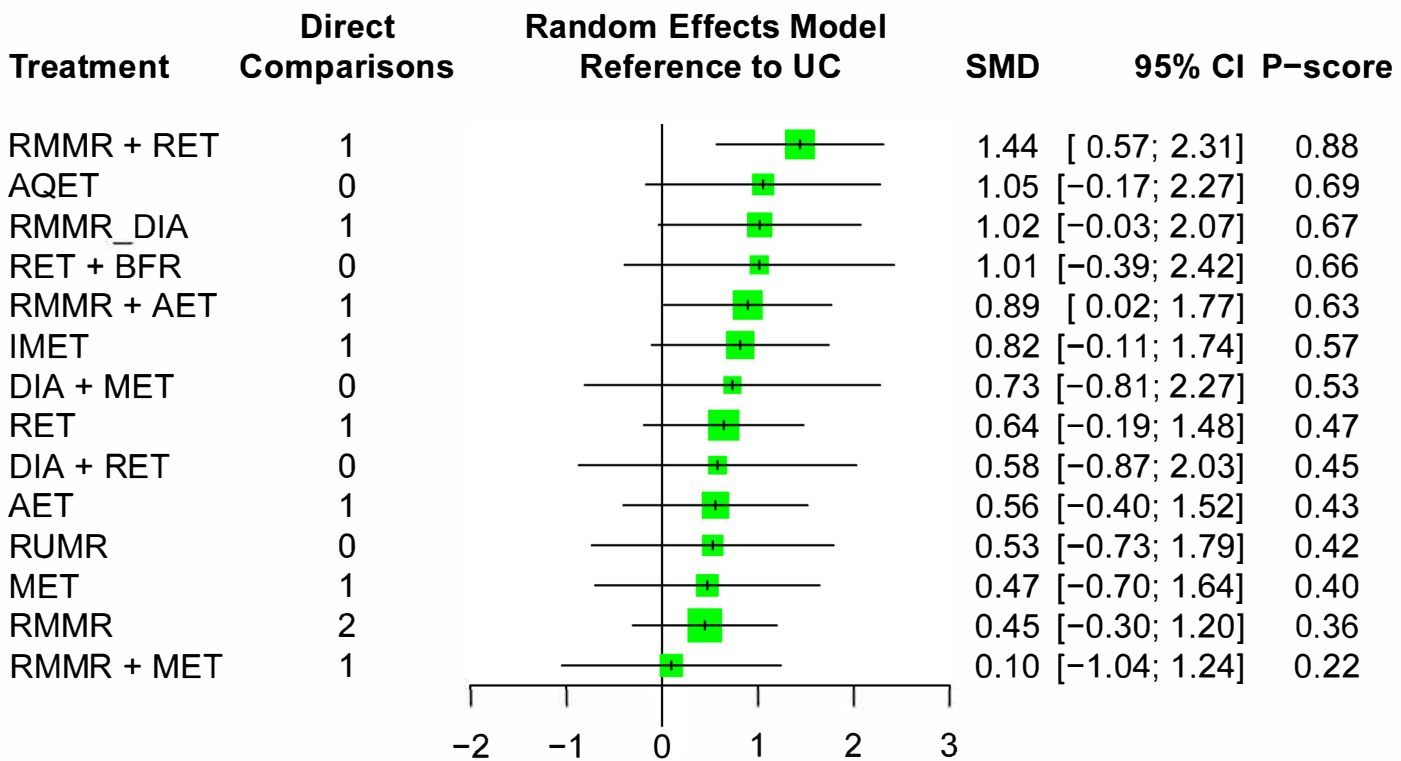

**Figure S1.** Forest plot summarizing effects of diet, exercise interventions, and combined treatments on changes of muscle mass at each follow up duration. Each point estimate (square) at each time frame and during an overall duration presents the network combined effect (standard mean difference) of the muscle mass with reference to UC, with 95% CI (horizontal line). Results plotted on the right-hand side indicate effects in favor of treatment.  
95% CI = 95% confidence interval; AET, aerobic exercise training; AQET, aquatic exercise training; BFR, blood flow restriction; DIA, diet instruction and advisement; IMET, isometric exercise training; IMMR, intermittent multi-meal replacement; MET, multicomponent exercise training; RET, resistance exercise training; RMMR, regular multi-meal replacement; RUMR, regular uni-meal replacement; Std = standard; UC, usual care.

Supplementary figure S2

(A) Overall follow-up duration

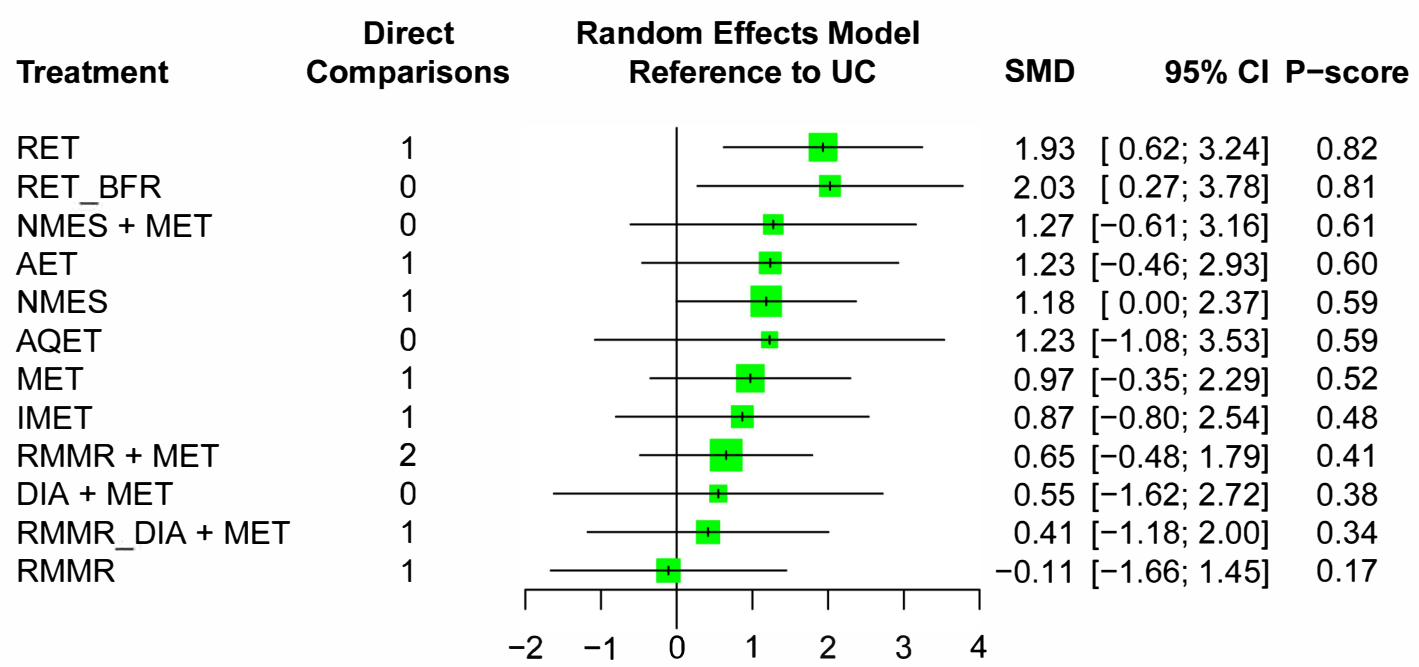

(B) Follow up >6 months

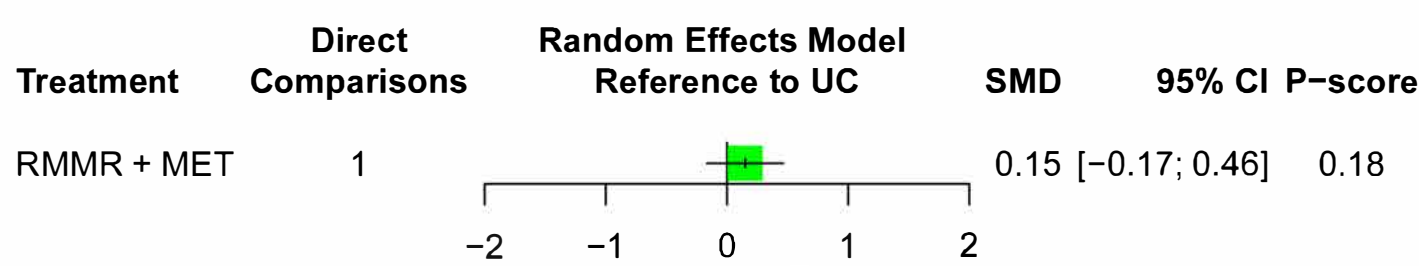

(C) Follow up >3 months, ≤6 months

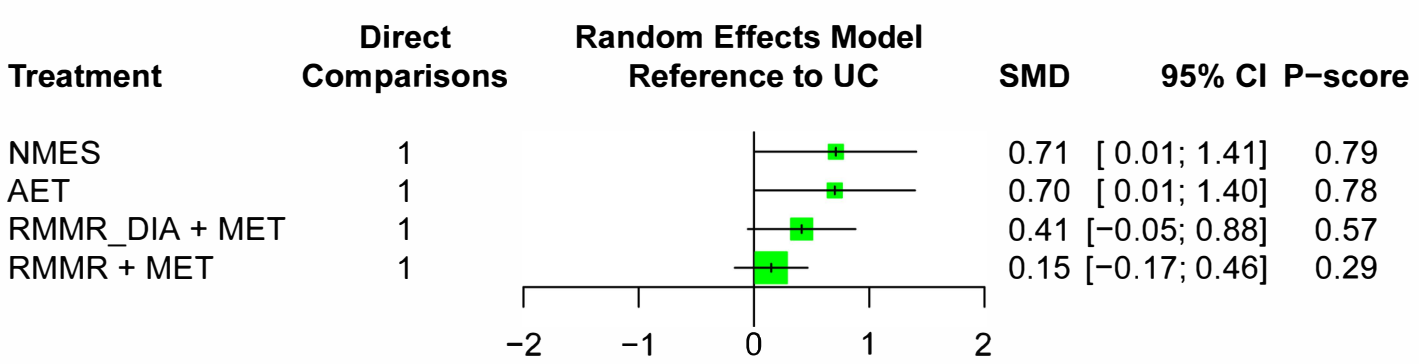

(D) Follow up ≤3 months

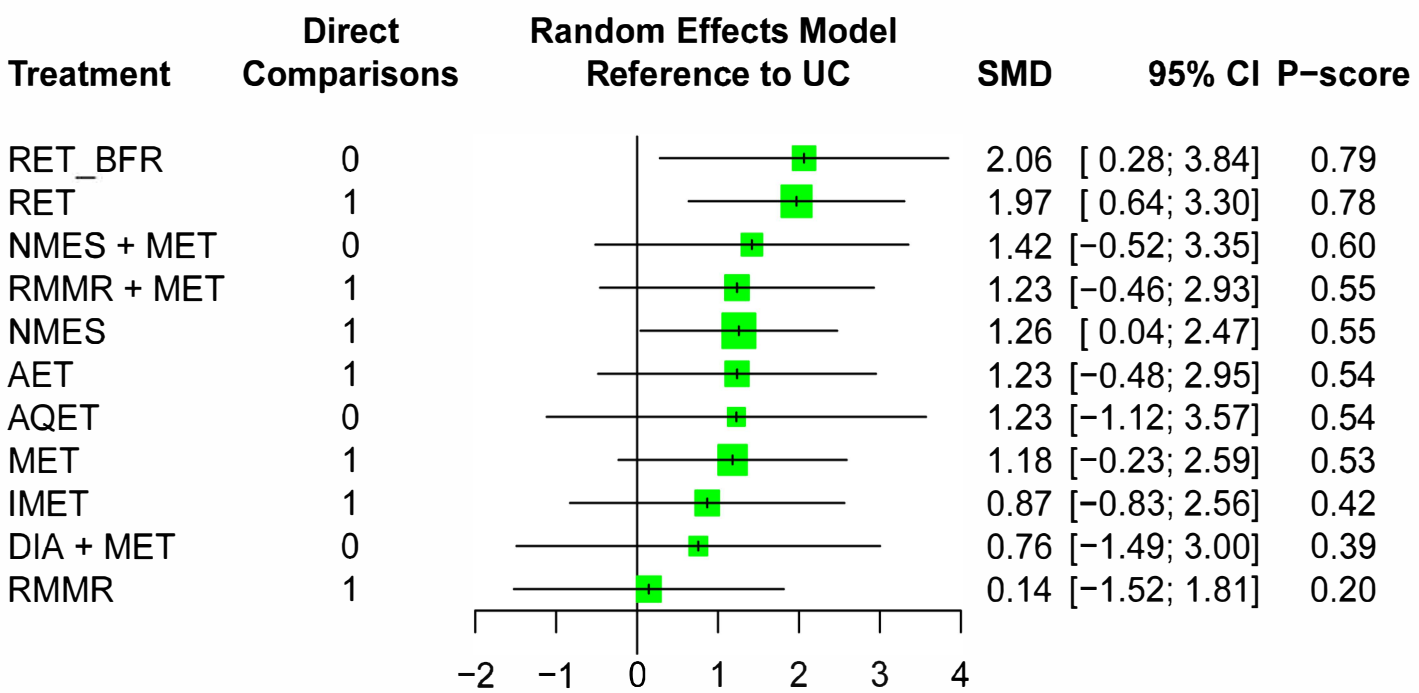

**FigureS2.** Forest plot summarizing effects of diet, exercise interventions, and combined treatments on changes of muscle strength at each follow up duration. Each point estimate (square) at each time frame and during an overall duration presents the network combined effect (standard mean difference) of the muscle mass with reference to UC, with 95% CI (horizontal line). Results plotted on the right-hand side indicate effects in favor of treatment.  
95% CI = 95% confidence interval; AET, aerobic exercise training; DIA, diet instruction and advisement; MET, multicomponent exercise training; RET, resistance exercise training; RMMR, regular multi-meal replacement; RUMR, regular uni-meal replacement; Std = standard; UC, usual care.

Supplementary figure S3

(A) Overall follow-up duration

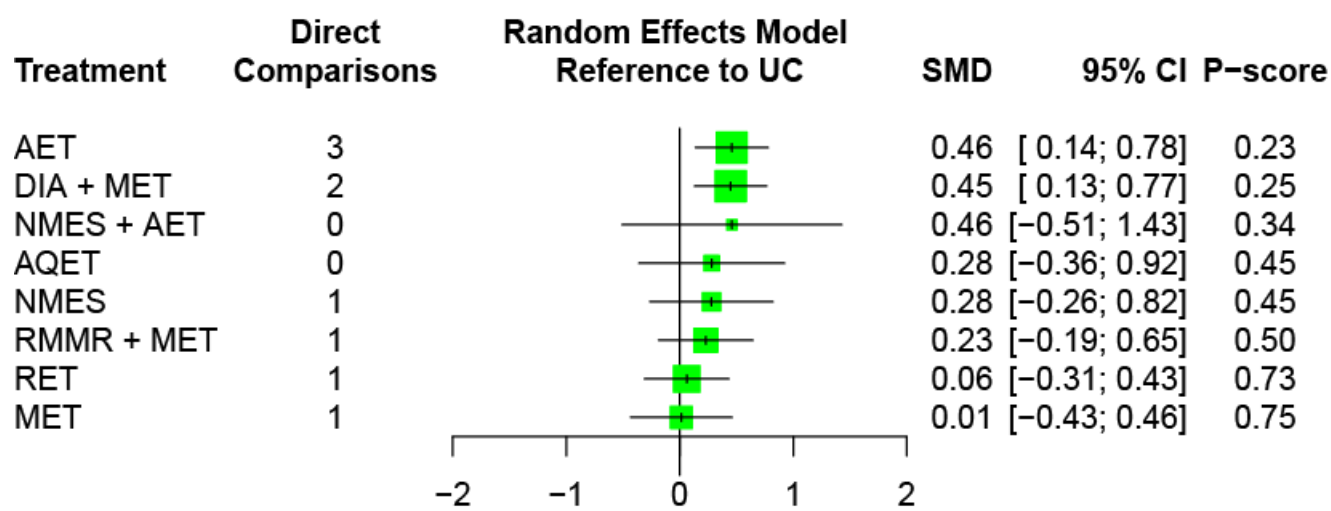

(B) Follow up >6 months

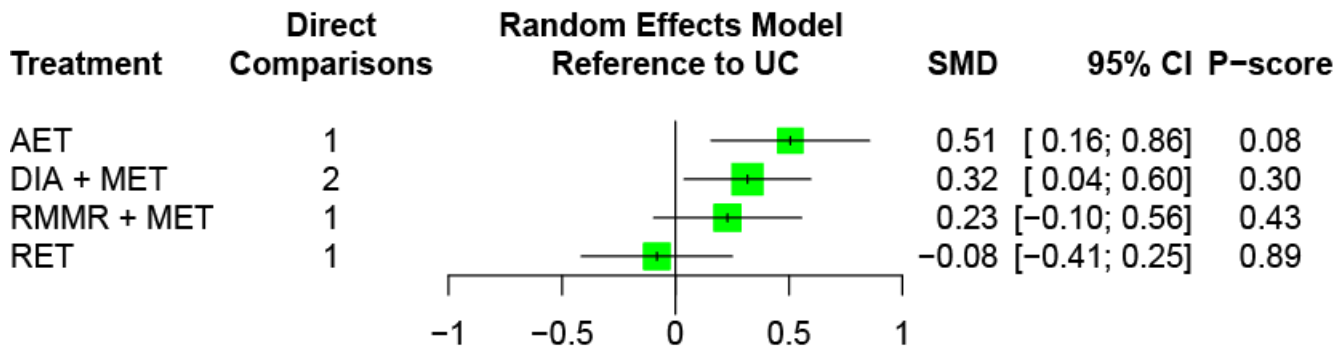

(C) Follow up >3 months, ≤6 months

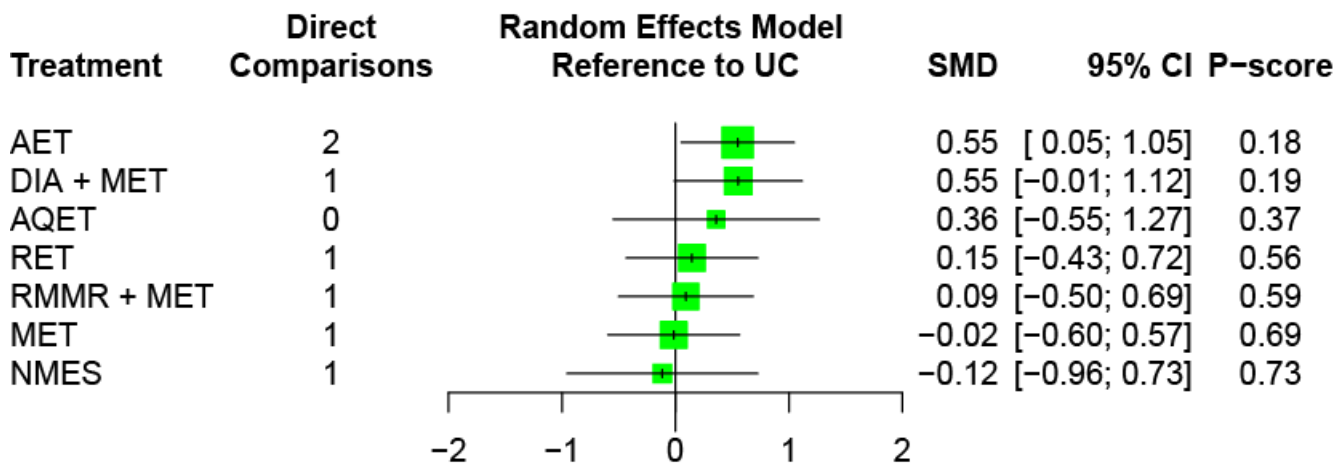

(D) Follow up ≤3 months

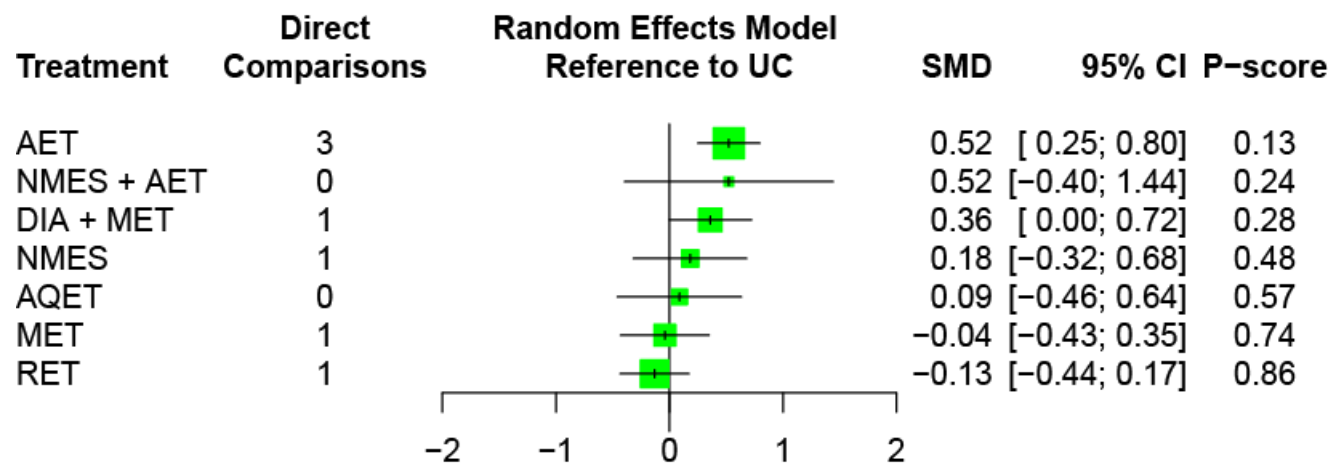

**Figure S3.** Forest plot summarizing effects of diet, exercise interventions, and combined treatments on changes of walk speed at each follow up duration. Each point estimate (square) at each time frame and during an overall duration presents the network combined effect (standard mean difference) of the muscle mass with reference to UC, with 95% CI (horizontal line). Results plotted on the right-hand side indicate effects in favor of treatment. 95% CI = 95% confidence interval; AET, aerobic exercise training; AQET, aquatic exercise training; DIA, diet instruction and advisement; IMET, isometric exercise training; MET, multicomponent exercise training; NMES, neuromuscular electric stimulation; RET, resistance exercise training; RMMR, regular multi-meal replacement; RUMR, regular uni-meal replacement; Std = standard; UC, usual care.

### Supplementary figure S4

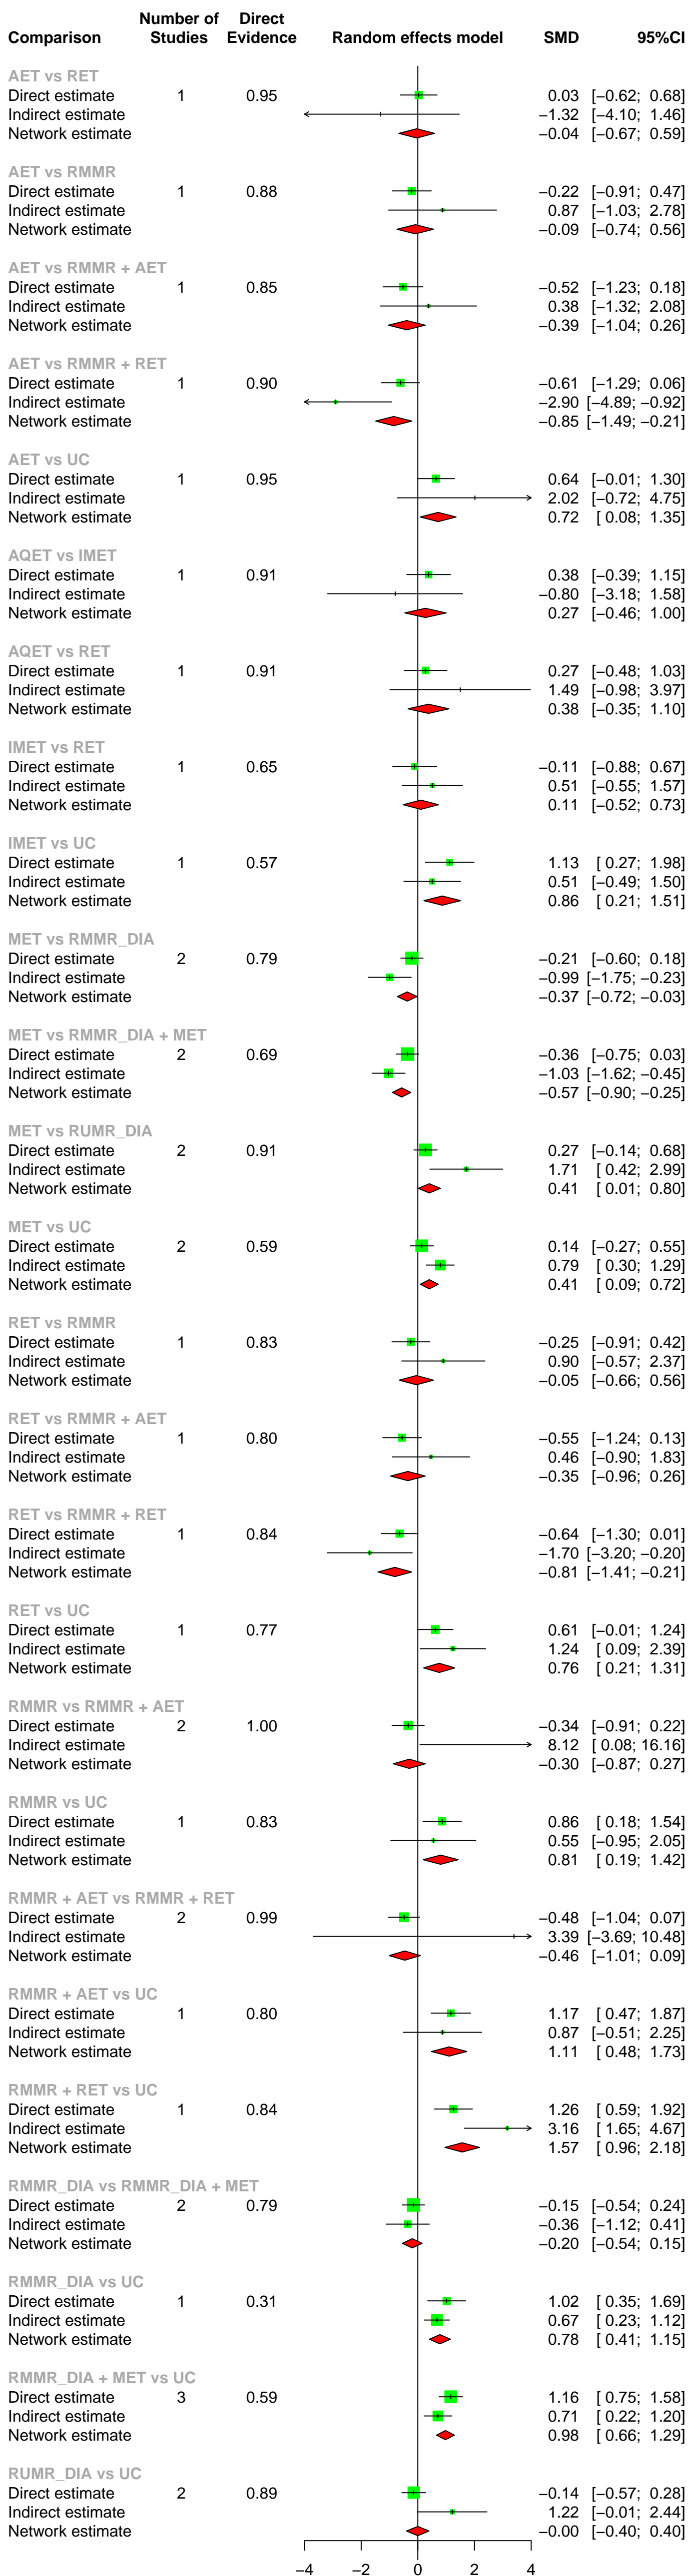



Supplementary figure S5

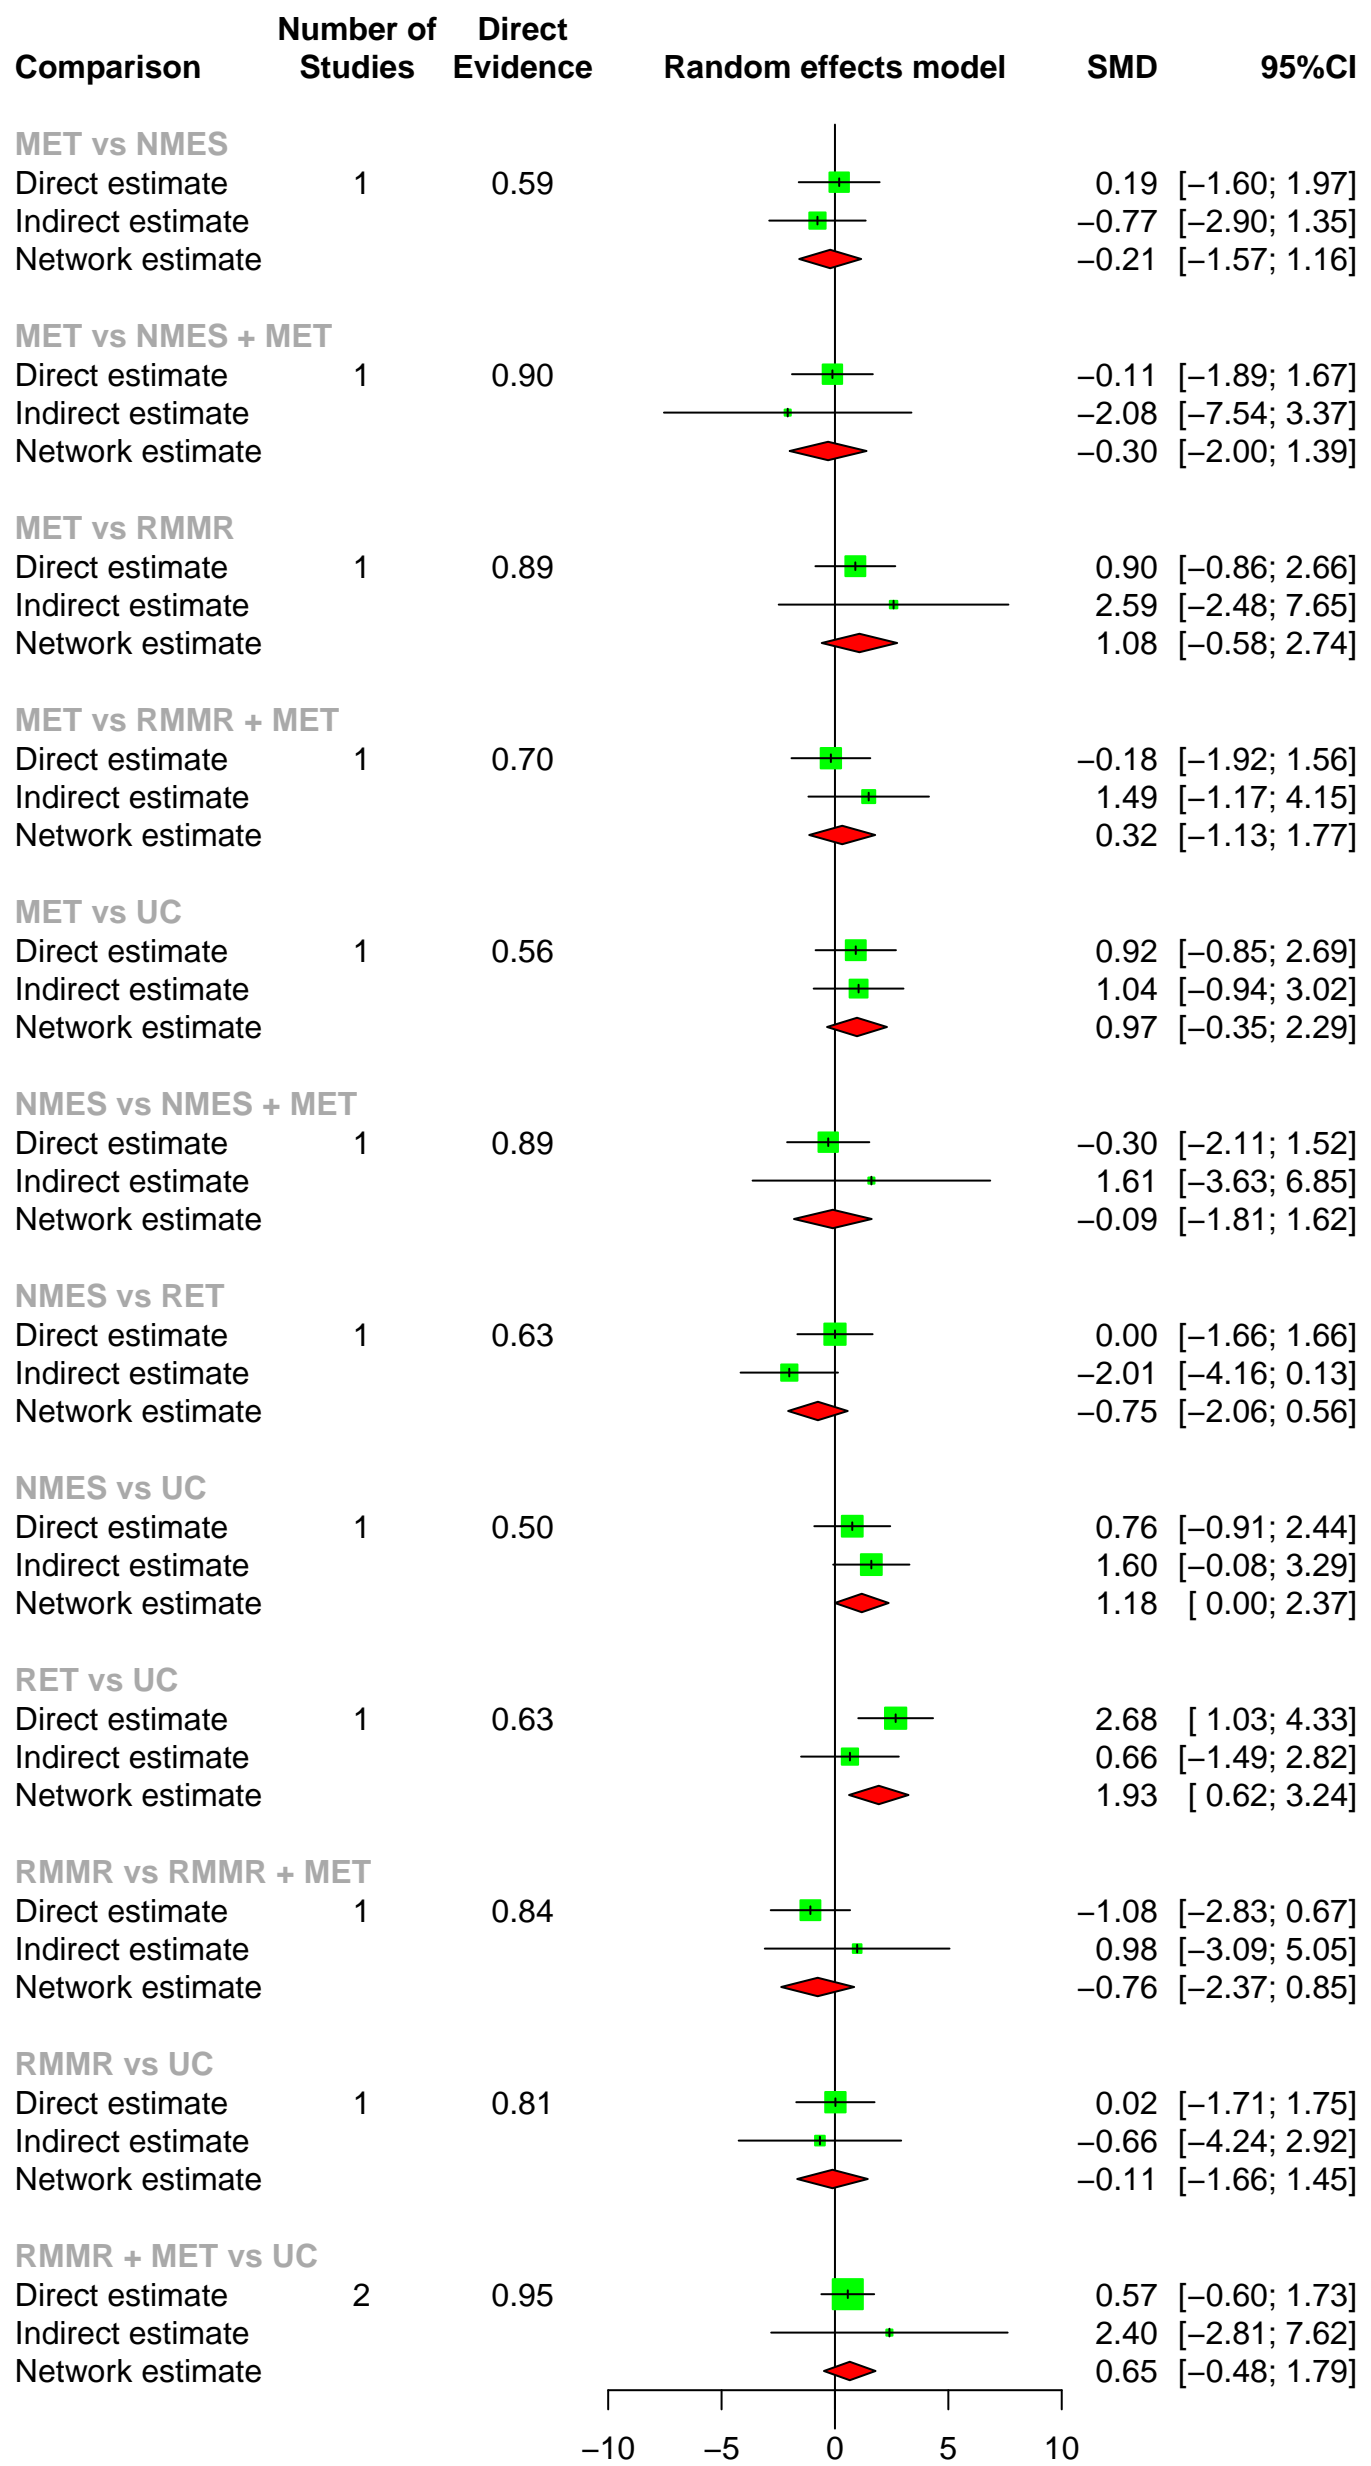

## Supplementary figure S6

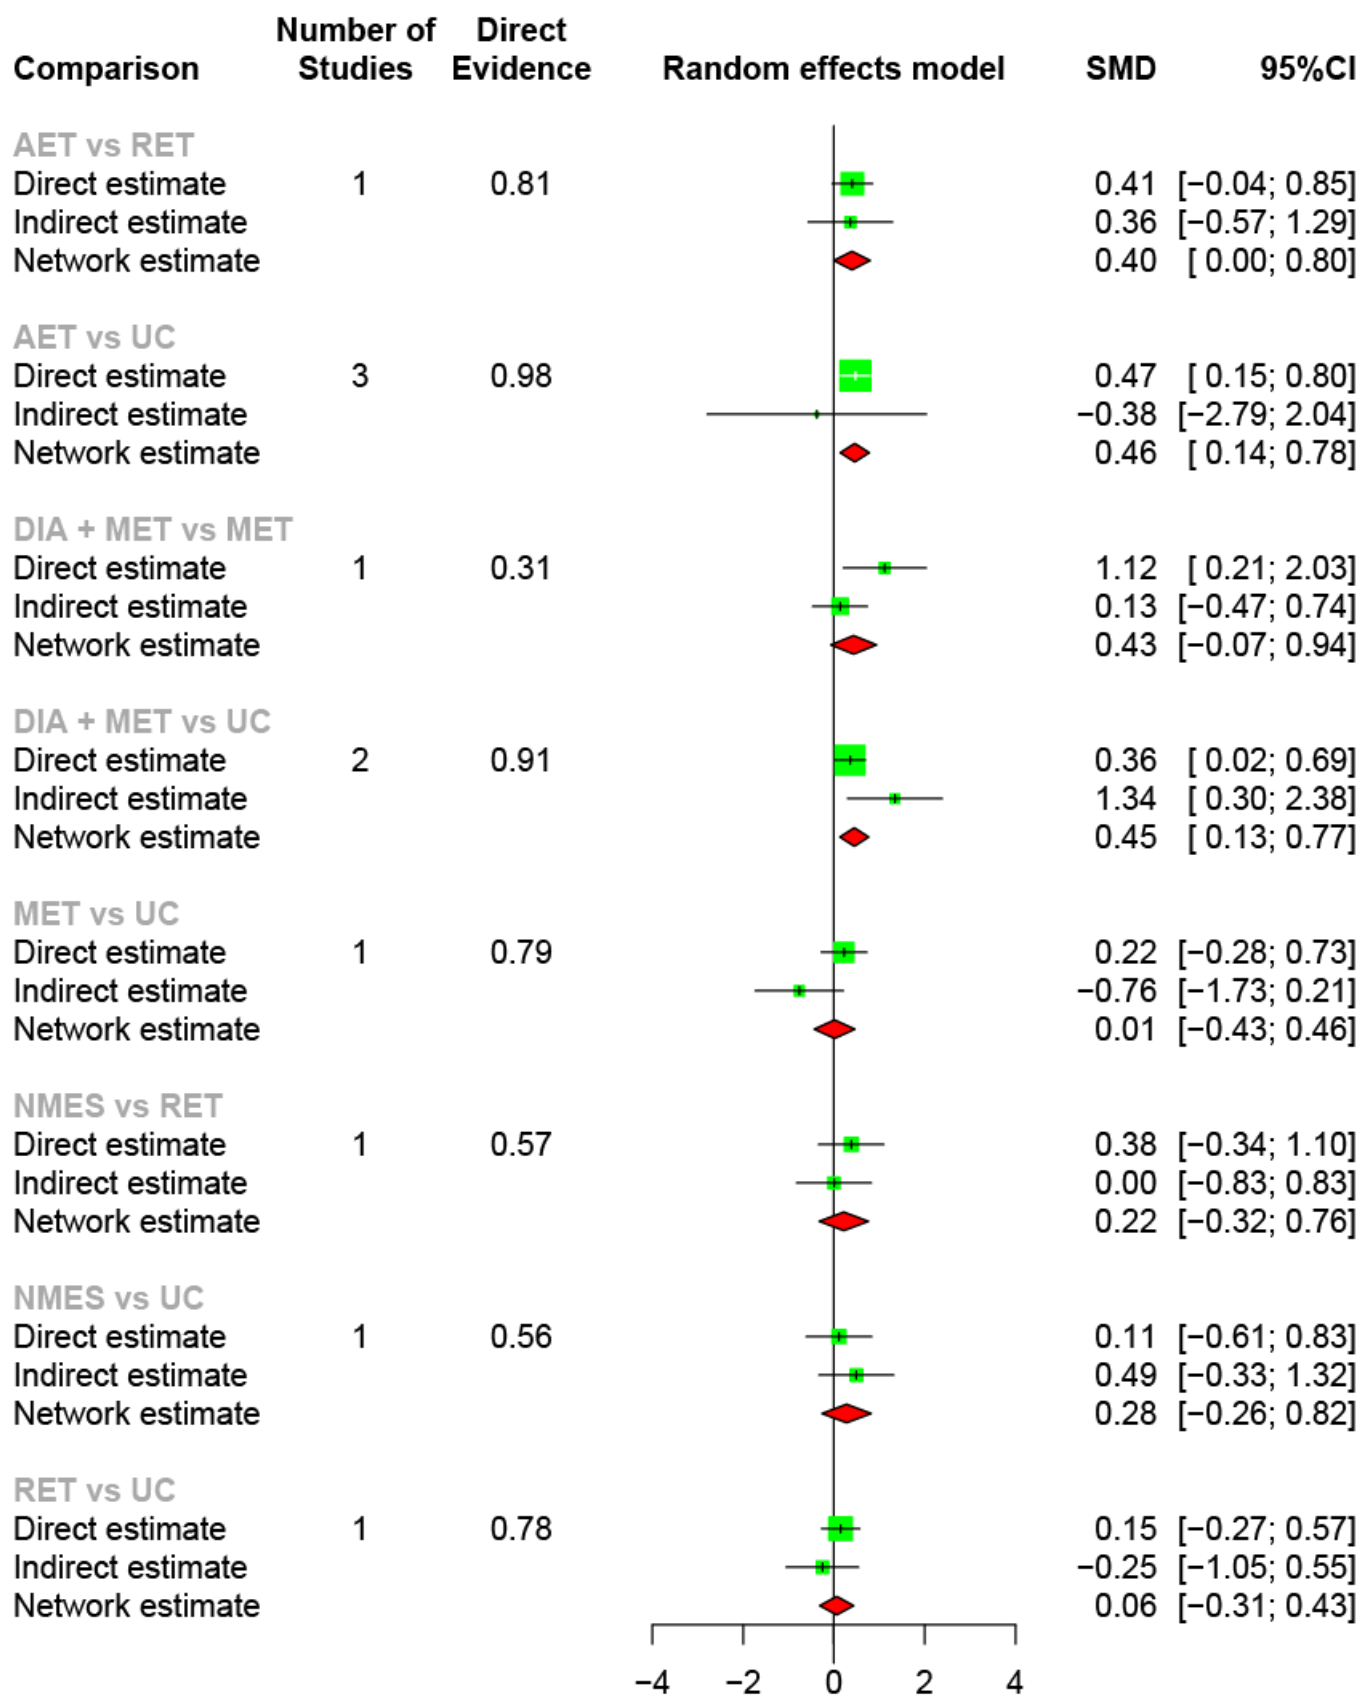

Supplementary figure S7

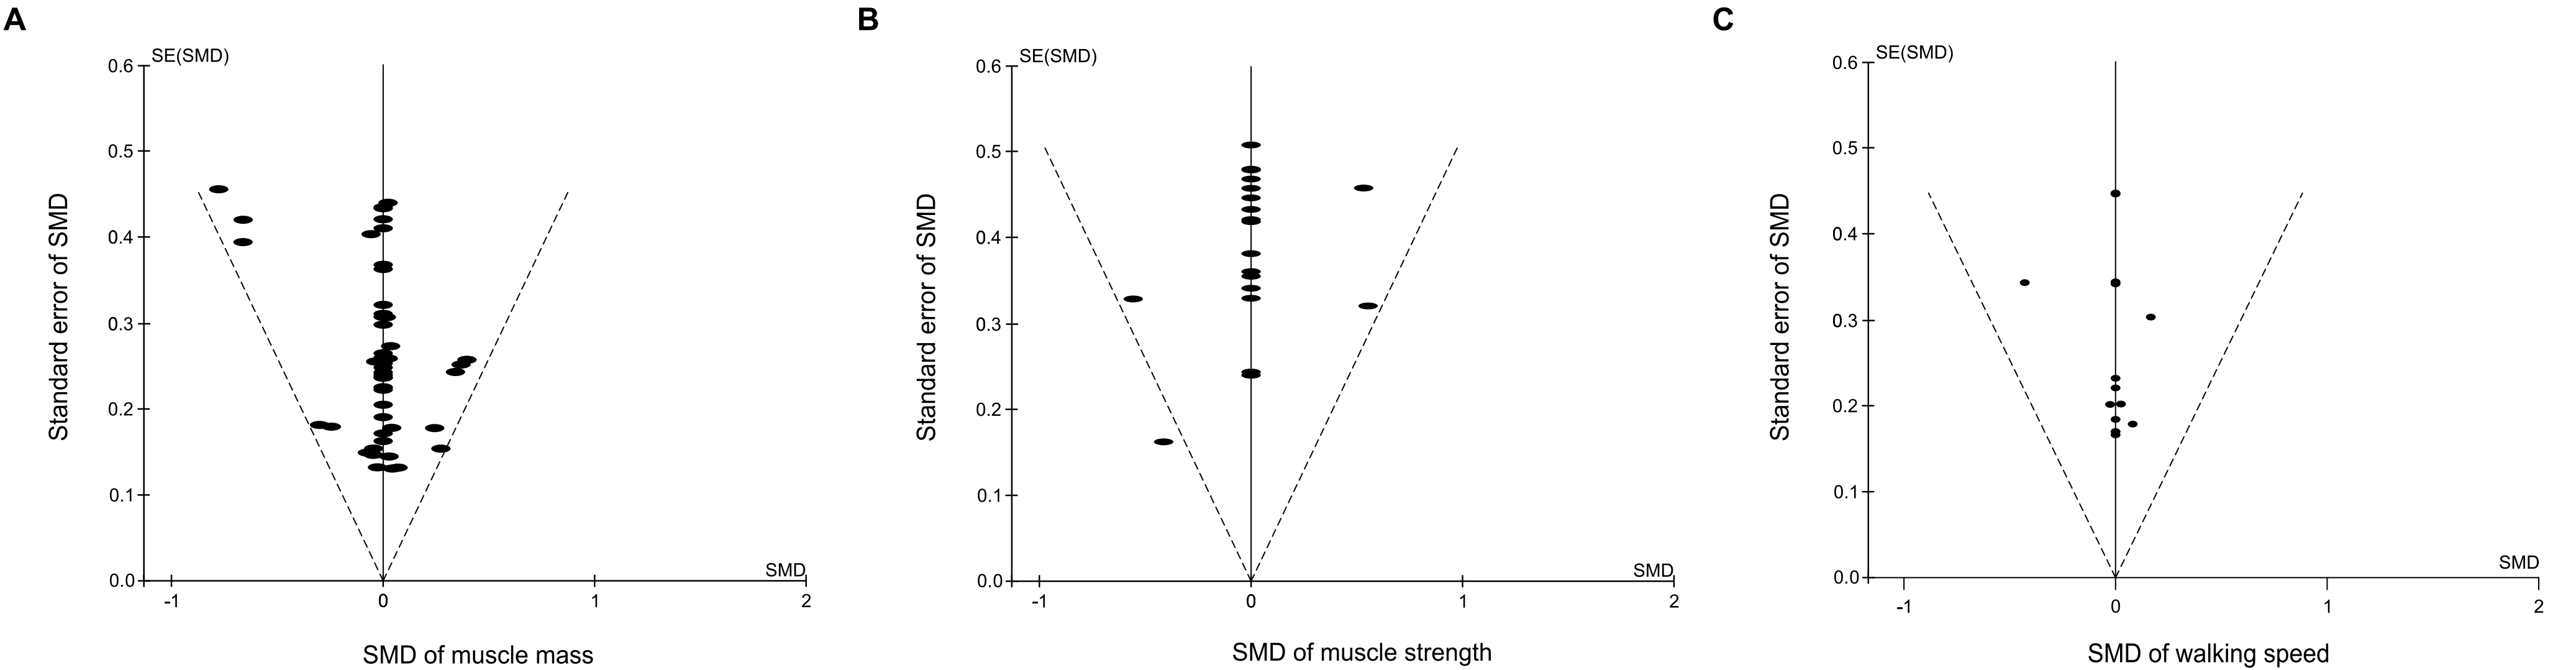

Figure S7. Funnel plots of the intervention effects for (A) muscle mass, (B) muscle strength, and (C) walking speed. Each circle denotes an independent comparison, with the X-axis representing a standard mean difference (SMD) over control comparisons and the Y-axis depicting the standard error (SE) of SMD.
